# Supplementary material
Source: publisher figshare collection journal article supplement (https://gsapubs.figshare.com/ndownloader/files/33890867)
Supplement: Supplementary file 1 [file 33890867]

## Sheet: Figure_S2
Acquisition parameters and spatial extent of various aeromagnetic surveys compiled by the SGU from the Jämtland, Västernorrland and Gävleborg counties (central Sweden)
Flight survey ID	Flight year	MIN_X (SWEREF 99TM)	MIN_Y (SWEREF 99TM)	MAX_X (SWEREF 99TM)	MAX_Y (SWEREF 99TM)	Azimuth	Nominal altitude (m)	Line spacing (m)	Point distance (m)
FPBF	2001	488298	6.9737e+06	500260	6.98846e+06	45	60	200	4
FSAF	1978	490444	6.94191e+06	541432	6.99828e+06	0	30	200	40
FSAM	1978	553122	6.98605e+06	590746	6.99867e+06	90	30	200	35
FQAH	1978	389446	7.06016e+06	459000	7.0967e+06	90	30	200	40
FRAM	1977	539941	6.98604e+06	596920	7.05431e+06	90	30	200	35
FPBH	2001	501573	6900894	506018	6.90557e+06	45	60	200	4
FVAL	1981	540781	6.96082e+06	600860	6.98625e+06	90	30	200	35
FXAF	1983	538564	7.09783e+06	583667	7.12371e+06	90	30	200	40
FXAE	1983	538882	7.04785e+06	582783	7.09859e+06	90	30	200	40
FNBD	1999	538142	7.12307e+06	562631	7.14083e+06	90	60	200-400	16
FRAG	1977	460599	6.99688e+06	540824	7023273	90	30	200	40
FPBG	2001	473877	6.94083e+06	497122	6.97491e+06	45	60	200	4
FMBC	1998	565887	6.95262e+06	573096	6.96154e+06	90	60	200	16
FUBC	2006	390462	6.9662e+06	416559	6.98662e+06	90	60	400	16
FQAF	1976	466273	6.92238e+06	516332	6.94851e+06	90	30	200	40
FTBB	2005	411871	6.84981e+06	418350	6.86021e+06	90	60	200-400	16
FSBE	2004	418706	6.8341e+06	443199	6.84689e+06	90	60	800	16
FTBC	2005	360672	6.84981e+06	418003	6.90682e+06	90	60	800	16
FRAC	1977	492206	6.84953e+06	505833	6.87267e+06	90	30	200	40
FSAG	1978	540419	6.94918e+06	566383	6.9986e+06	0	30	200	40
FUBF	2006	437866	7.12687e+06	514336	7.17736e+06	90	60	400	16
FKBC	1996	439071	6.99659e+06	491327	7.04765e+06	90	60	200	16
FVAD	1981	442061	6.82662e+06	473764	6.8475e+06	90	30	200	40
FSAE	1978	459663	6.97208e+06	491959	6.99747e+06	90	30	200	40
FRAE	1977	466597	6.8972e+06	518402	6.92247e+06	90	30	200	40
FRAD	1977	491896	6.87272e+06	522510	6.89784e+06	90	30	200	40
FUBD	2006	539381	6.98931e+06	594577	7037768	90	60	200-400	16
FZBC	2011	406168	7.0126e+06	440463	7.0388e+06	90	60	200	7
FRAF	1977	459978	6.94709e+06	491272	6.97227e+06	90	30	200	40
FQAG	1976	389418	7.09614e+06	449408	7.10863e+06	90	30	200	40
FUBB	2006	415490	6.89516e+06	467086	6.99941e+06	0	60	400	16
FUBE	2006	489999	7.02197e+06	540338	7.1365e+06	0	60	400	16
FSAN	1978	528503	6.94398e+06	558647	6.9684e+06	0	30	200	35
FSBF	2004	415723	6.84658e+06	493412	6.89757e+06	90	60	400-800	16
FJAD	1969	503835	7.13557e+06	548756	7.15395e+06	90	30	200	40
FSAO	1978	527816	6.99793e+06	553100	7.02323e+06	90	30	200	35
FXAE	1983	539375	7.04796e+06	590454	7.09864e+06	90	30	200	40
FBBB	1987	581427	7050058	646792	7.0939e+06	90	30	200	40
FTAH	1979	566236	6.89844e+06	592049	6.94873e+06	0	30	200	40
FPBH	2001	492038	6902682	510651	6.92455e+06	45	60	200	4
FXAF	1975	582506	7098382	587384	7.102e+06	0	30	152	40
FQAF	1976	488554	6.92266e+06	517569	6.9424e+06	90	30	200	40
FSAF	1978	516126	6.9218e+06	542572	6.95051e+06	0	30	200	40
FBBA	1987	589330	7.07348e+06	614848	7.09639e+06	0	30	152	40
FSAM	1978	584416	6.99191e+06	590675	6.99871e+06	90	30	200	35
FSAN	1978	528795	6.94287e+06	558835	6.95444e+06	0	30	200	35
FPBG	2001	490385	6940092	497122	6.9418e+06	45	60	200	4
FUBE	2006	538640	7.05739e+06	539865	7.05947e+06	0	60	400	16
FRAM	1977	542793	6.98623e+06	615735	7.05501e+06	90	30	200	35
FUBD	2006	547623	6989332	640696	7.07832e+06	90	60	200-400	16
FRAE	1977	488153	6.89783e+06	541871	6.92312e+06	90	30	200	40
FSAG	1978	541019	6898129	566660	6.95524e+06	0	30	200	40
FMBC	1998	565969	6.94829e+06	616405	6.96204e+06	90	60	200	16
FVAL	1981	571709	6.96101e+06	616047	6.98668e+06	90	30	200	35
FXAH	1975	584607	7.05364e+06	639688	7.09057e+06	0	30	152	40
FRAD	1977	504638	6872874	542180	6.89813e+06	90	30	200	40
FTAI	1979	541871	6848152	592470	6.89875e+06	0	30	200	40
